# Supplementary material for: Detection of Inferred CCR5- and CXCR4-Using HIV-1 Variants and Evolutionary Intermediates Using Ultra-Deep Pyrosequencing
Source: PubMed Central journal article supplement (PMC3121885; doi:10.1371/journal.ppat.1002106), 2011-06-23
Supplement: ppat.1002106.s007.pdf [file ppat.1002106.s007.pdf]

**Table S1:** Predicted phenotypes and V3 sequences of longitudinally isolated Env clones of subject DS1 for which coreceptor usage was determined in the Trofile assay.

| Time point<br>(mo to T0) | <i>n</i> clones | Phenotype<br>Trofile | Predicted phenotype<br>(PSSM/g2p) | V3 sequence <sup>a</sup><br>CTRPNNNTRKSIISIGPGRAFYTGEIIGDIRQAHC |
|--------------------------|-----------------|----------------------|-----------------------------------|-----------------------------------------------------------------|
| -6                       | 8               | R5                   | nsi/r5                            | -----                                                           |
|                          | 1               | R5                   | nsi/r5                            | -----Q-----                                                     |
|                          | 1               | R5                   | nsi/r5                            | -I-----D-H-----.-V-----                                         |
| 0                        | 4               | R5                   | nsi/r5                            | -----                                                           |
|                          | 1               | R5                   | nsi/r5                            | -----G-----                                                     |
|                          | 4               | Dual-X               | si/x4                             | -----QR-----RQ-----                                             |
|                          | 1               | Dual-X               | si/x4                             | -----QR-----IRQ-----                                            |
|                          | 1               | Dual-X               | si/x4                             | -----ER-----RQ-----                                             |

<sup>a</sup> V3 amino acid sequences are shown relative to the major sequence in PBMCs at time point -9 months as determined by ultra-deep sequencing. A dot indicates a deletion in the V3 loop at that position.
