# Supplementary material for: Detection of Inferred CCR5- and CXCR4-Using HIV-1 Variants and Evolutionary Intermediates Using Ultra-Deep Pyrosequencing
Source: PubMed Central journal article supplement (PMC3121885; doi:10.1371/journal.ppat.1002106), 2011-06-23
Supplement: ppat.1002106.s008.pdf [file ppat.1002106.s008.pdf]

**Table S2:** Predicted phenotypes and V3 sequences of longitudinally isolated Env clones of subject DS2 for which coreceptor usage was determined in the Trofile assay.

| Time point<br>(mo to T0) | <i>n</i> clones | Phenotype<br>Trofile | Predicted phenotype<br>(PSSM/g2p) | V3 sequence <sup>a</sup><br>CIRPNNNTRKGIHIGPGRAFYTGTGEIIGDIRQAHC |
|--------------------------|-----------------|----------------------|-----------------------------------|------------------------------------------------------------------|
| -9                       | 4               | R5                   | nsi/r5                            | -T-----S-P-----                                                  |
|                          | 1               | R5                   | nsi/r5                            | -T-----S-----N---S-                                              |
|                          | 1               | R5                   | nsi/r5                            | -T-----N---S-                                                    |
|                          | 1               | R5                   | nsi/r5                            | -A-----                                                          |
| -6                       | 5               | R5                   | nsi/r5                            | -T-----                                                          |
|                          | 4               | R5                   | nsi/r5                            | -T-----S-P-----                                                  |
|                          | 1               | R5                   | nsi/r5                            | -T-----S-P---K-----                                              |
|                          | 1               | R5                   | nsi/r5                            | -T-----S---K-----                                                |
|                          | 1               | R5                   | nsi/r5                            | -T-----S-----N---S-                                              |
| 0                        | 9               | R5                   | nsi/r5                            | -T-----S-----A---N---S-                                          |
|                          | 1               | R5                   | nsi/r5                            | -T-----S-P-----                                                  |
|                          | 1               | R5                   | nsi/r5                            | -T-----S---K-----                                                |
|                          | 1               | R5                   | nsi/r5                            | -T-----S-----N---F-                                              |
| 11                       | 5               | R5                   | nsi/r5                            | -T-----S-P-----                                                  |
|                          | 5               | R5                   | nsi/r5                            | -T-----S---K-----                                                |
| 14                       | 3               | R5                   | nsi/r5                            | -T-----                                                          |
|                          | 3               | R5                   | nsi/r5                            | -T-----S-P-----                                                  |
|                          | 2               | R5                   | nsi/r5                            | -T-----S---K-----                                                |
|                          | 2               | Dual-X               | si/x4                             | -T---Y---Y---V---K-----                                          |
|                          | 1               | Dual-X               | si/x4                             | -T---Y---Y---K-V---K-----                                        |

<sup>a</sup> V3 amino acid sequences are shown relative to the major sequence in PBMCs at time point -12 months as determined by ultra-deep sequencing.
