# Supplementary material for: Detection of Inferred CCR5- and CXCR4-Using HIV-1 Variants and Evolutionary Intermediates Using Ultra-Deep Pyrosequencing
Source: PubMed Central journal article supplement (PMC3121885; doi:10.1371/journal.ppat.1002106), 2011-06-23
Supplement: ppat.1002106.s009.pdf [file ppat.1002106.s009.pdf]

**Table S3:** Predicted phenotypes and V3 sequences of longitudinally isolated Env clones of subject DS3 for which coreceptor usage was determined in the Trofile assay.

| Time point<br>(mo to T0) | <i>n</i> clones | Phenotype<br>Trofile | Predicted phenotype<br>(PSSM/g2p) | V3 sequence <sup>a</sup><br>CIRPNNNTRKGIHIGPGRVIFYATGEIIGDIRRAHC |
|--------------------------|-----------------|----------------------|-----------------------------------|------------------------------------------------------------------|
| -6                       | 4               | R5                   | nsi/r5                            | -E-----                                                          |
|                          | 2               | R5                   | nsi/r5                            | -T-----T-F-----                                                  |
|                          | 2               | R5                   | nsi/r5                            | -I-----S-----T-F-----                                            |
|                          | 1               | R5                   | nsi/r5                            | -----S-----T-F-----K---                                          |
|                          | 1               | R5                   | nsi/r5                            | -T-----S-----T-F-----                                            |
|                          | 4               | Dual-R               | nsi/r5                            | -E-----                                                          |
|                          | 1               | Dual-R               | si/r5                             | -E-----G-----                                                    |
| -3                       | 2               | R5                   | nsi/r5                            | -E-----S-P-----F---G-----                                        |
|                          | 1               | R5                   | nsi/r5                            | -----G-----T-F-----Y-                                            |
|                          | 1               | R5                   | nsi/r5                            | -T-----S-----T-F-----Y-                                          |
|                          | 1               | R5                   | nsi/r5                            | -T-----S-P-----F---G-----                                        |
|                          | 1               | Dual-R               | nsi/r5                            | -E-----S-P-----F---G-----                                        |
|                          | 1               | Dual-R               | nsi/r5                            | -----                                                            |
|                          | 1               | Dual-R               | nsi/r5                            | -T-----F-----K---                                                |
|                          | 1               | Dual-R               | nsi/r5                            | -----S-----T-F-----K---                                          |
|                          | 1               | Dual-R               | nsi/r5                            | -----K---                                                        |
|                          | 1               | Dual-R               | nsi/r5                            | -E-----S-P-----F---G-----                                        |
| 0                        | 3               | R5                   | nsi/r5                            | -E-----S-P-----F---G-----                                        |
|                          | 1               | R5                   | nsi/r5                            | -E-----                                                          |
|                          | 1               | R5                   | nsi/r5                            | -E-----K---                                                      |
|                          | 1               | Dual-R               | nsi/r5                            | -E-----                                                          |
|                          | 1               | Dual-R               | nsi/r5                            | -E-----S-P-----F---G-----                                        |
|                          | 1               | Dual-R               | nsi/r5                            | -E-----K---                                                      |
|                          | 2               | Dual-X               | si/x4                             | -M-----R-----V---EK---N-----                                     |
| 6                        | 2               | R5                   | nsi/r5                            | -E-----F---V-----Y-                                              |
|                          | 2               | R5                   | nsi/r5                            | -E-----T-F-----Y-                                                |
|                          | 1               | R5                   | si/x4                             | -T-----EG-----Y-                                                 |
|                          | 1               | R5                   | nsi/r5                            | -E-----                                                          |
|                          | 3               | Dual-R               | nsi/r5                            | -E-----                                                          |
|                          | 2               | Dual-R               | nsi/r5                            | -E-----F---V-----Y-                                              |
|                          | 2               | Dual-X               | si/x4                             | -M-----Y-----V---EK---N-----                                     |
|                          | 1               | Dual-X               | si/x4                             | -M-----S-----V---EK---N-----                                     |
| 9                        | 1               | R5                   | nsi/r5                            | -E-----T-F-----Y-                                                |
|                          | 1               | Dual-R               | nsi/r5                            | -T-----F---V-----Y-                                              |
|                          | 1               | Dual-R               | nsi/r5                            | -E-----F---V-----Y-                                              |
|                          | 1               | Dual-R               | nsi/r5                            | -T-----F-----Y-                                                  |
|                          | 4               | Dual-X               | si/x4                             | -E-----A-----V---EK---N-----                                     |
|                          | 2               | Dual-X               | si/x4                             | -M-----A-----V---EK---N-----                                     |
|                          | 1               | Dual-X               | si/x4                             | -E-----A-----V---EK---N-----                                     |
|                          | 1               | Dual-X               | si/x4                             | -M-----S-----V---EK---N-----                                     |
|                          | 1               | Dual-X               | si/x4                             | -M-----S-----V---EK---N-----                                     |
|                          | 1               | Dual-X               | si/x4                             | -E-----S-----V---EK---N-----                                     |
|                          | 1               | Dual-X               | si/x4                             | -E-----S-----V---EK---N-----                                     |

<sup>a</sup> V3 amino acid sequences are shown relative to the major sequence in PBMCs at time point -9 months as determined by ultra-deep sequencing.
