# Supplementary material for: Detection of Inferred CCR5- and CXCR4-Using HIV-1 Variants and Evolutionary Intermediates Using Ultra-Deep Pyrosequencing
Source: PubMed Central journal article supplement (PMC3121885; doi:10.1371/journal.ppat.1002106), 2011-06-23
Supplement: ppat.1002106.s010.pdf [file ppat.1002106.s010.pdf]

**Table S4:** Predicted phenotypes and V3 sequences of longitudinally isolated Env clones of subject DS4 for which coreceptor usage was determined in the Trofile assay.

| Time point<br>(mo to T0) | <i>n</i> clones | Phenotype<br>Trofile | Predicted phenotype<br>(PSSM/g2p) | V3 sequence <sup>a</sup><br>CTRPNNNTRKRSINIGPGRAFYYTTGAIIGDIRQAHC |
|--------------------------|-----------------|----------------------|-----------------------------------|-------------------------------------------------------------------|
| -6                       | 4               | R5                   | nsi/r5                            | -----                                                             |
|                          | 2               | R5                   | nsi/r5                            | -----I-----                                                       |
|                          | 1               | R5                   | nsi/r5                            | -----N-----                                                       |
|                          | 1               | R5                   | nsi/r5                            | -----E--N-----                                                    |
| -3                       | 3               | R5                   | nsi/r5                            | -----K-----                                                       |
|                          | 6               | Dual-R               | nsi/r5                            | -----K-----                                                       |
| 0                        | 8               | R5                   | nsi/r5                            | -----T-----                                                       |
|                          | 4               | Dual-X               | si/x4                             | -----IK-G-TL----V----K-----                                       |
| 6                        | 4               | R5                   | nsi/r5                            | -----T-----E--N-----                                              |
|                          | 2               | R5                   | nsi/r5                            | -----R-----                                                       |
|                          | 1               | R5                   | nsi/r5                            | -----E--N-----                                                    |
|                          | 5               | Dual-X               | si/x4                             | -----K-G-TL----V----K-V-----                                      |
| 9                        | 6               | R5                   | nsi/r5                            | -----E--N-----                                                    |
|                          | 2               | R5                   | nsi/r5                            | -----R-----                                                       |
|                          | 1               | R5                   | nsi/r5                            | -----E--N-K-----                                                  |
|                          | 1               | R5                   | nsi/r5                            | -----T-----                                                       |
|                          | 2               | Dual-X               | si/x4                             | -----K-G-TL----V----K-V-----                                      |
|                          | 1               | Dual-X               | si/x4                             | -----K-G-TL----V----K-----                                        |

<sup>a</sup> V3 amino acid sequences are shown relative to the major sequence in PBMCs at time point -12 months as determined by ultra-deep sequencing.
