# Supplementary material for: Detection of Inferred CCR5- and CXCR4-Using HIV-1 Variants and Evolutionary Intermediates Using Ultra-Deep Pyrosequencing
Source: PubMed Central journal article supplement (PMC3121885; doi:10.1371/journal.ppat.1002106), 2011-06-23
Supplement: ppat.1002106.s011.pdf [file ppat.1002106.s011.pdf]

**Table S5:** Predicted phenotypes and V3 sequences of longitudinally isolated Env clones of subject DS5 for which coreceptor usage was determined in the Trofile assay.

| Time point<br>(mo to T0) | <i>n</i> clones | Phenotype<br>Trofile | Predicted phenotype<br>(PSSM/g2p) | V3 sequence <sup>a</sup><br>CTRPNNNTRKGIHIGPGRTFYATGEIIGDIRQAHC |
|--------------------------|-----------------|----------------------|-----------------------------------|-----------------------------------------------------------------|
| -6                       | 9               | R5                   | nsi/r5                            | -----                                                           |
| -3                       | 7               | R5                   | nsi/r5                            | -----S-----                                                     |
|                          | 2               | R5                   | nsi/r5                            | -----                                                           |
|                          | 1               | R5                   | nsi/r5                            | -----HV-----                                                    |
| 0                        | 7               | R5                   | nsi/r5                            | -----                                                           |
|                          | 2               | R5                   | nsi/r5                            | -----S-----                                                     |
|                          | 1               | R5                   | nsi/r5                            | --G-----S-----                                                  |
|                          | 1               | R5                   | nsi/r5                            | -----RS-----ALFTA-----N-----                                    |
| 3                        | 5               | R5                   | nsi/r5                            | -----S-----                                                     |
|                          | 1               | R5                   | nsi/r5                            | -----M-----                                                     |
|                          | 1               | R5                   | nsi/r5                            | -----RS-----A-FTA-----N-----                                    |
|                          | 2               | Dual-X               | si/x4                             | -----RS-Y-----ARFTA-K-----K-Y-                                  |
| 6                        | 3               | R5                   | nsi/r5                            | -----                                                           |
|                          | 1               | R5                   | nsi/r5                            | -----V-----                                                     |
|                          | 1               | R5                   | nsi/r5                            | -----RS-Y-----                                                  |
|                          | 7               | Dual-X               | si/x4                             | -----RS-Y-----ARFTA-K-----K-Y-                                  |

<sup>a</sup> V3 amino acid sequences are shown relative to the major sequence in PBMCs at time point -12 months as determined by ultra-deep sequencing.
