# Supplementary material for: Detection of Inferred CCR5- and CXCR4-Using HIV-1 Variants and Evolutionary Intermediates Using Ultra-Deep Pyrosequencing
Source: PubMed Central journal article supplement (PMC3121885; doi:10.1371/journal.ppat.1002106), 2011-06-23
Supplement: ppat.1002106.s012.pdf [file ppat.1002106.s012.pdf]

**Table S6:** Predicted phenotypes and V3 sequences of longitudinally isolated Env clones of subject DS7 for which coreceptor usage was determined in the Trofile assay.

| Time point<br>(mo to T0) | <i>n</i> clones | Phenotype<br>Trofile | Predicted phenotype<br>(PSSM/g2p) | V3 sequence <sup>a</sup><br>CTRPNNNTRRSINIGPGRAFYTGTGQIIIGDIRQAHC |
|--------------------------|-----------------|----------------------|-----------------------------------|-------------------------------------------------------------------|
| -6                       | 7               | R5                   | nsi/r5                            | ----G----- .-E-----                                               |
|                          | 2               | R5                   | nsi/r5                            | -----K-----                                                       |
|                          | 1               | R5                   | nsi/r5                            | ----G----- .-E-V-----                                             |
|                          | 1               | R5                   | nsi/r5                            | ----G----- .-EM-----                                              |
|                          | 1               | R5                   | nsi/r5                            | ----G--G----- .-E-----                                            |
| 0                        | 3               | R5                   | nsi/r5                            | ----G----- .-E--N-----                                            |
|                          | 2               | R5                   | nsi/r5                            | ----G----- .-E-----                                               |
|                          | 1               | R5                   | nsi/r5                            | ----G----- D--N-----                                              |
|                          | 1               | R5                   | nsi/r5                            | ----G----- .-E--NL-----                                           |
|                          | 3               | Dual-X               | si/x4                             | -----KR-SL----VY-----K---                                         |
| 1                        | Dual-X          | si/x4                | -----KR-SL----VY-----MRK---       |                                                                   |

<sup>a</sup> V3 amino acid sequences are shown relative to the major sequence in PBMCs at time point -12 months as determined by ultra-deep sequencing. A dot indicates a deletion in the V3 loop at that position.
