# Supplementary material for: Detection of Inferred CCR5- and CXCR4-Using HIV-1 Variants and Evolutionary Intermediates Using Ultra-Deep Pyrosequencing
Source: PubMed Central journal article supplement (PMC3121885; doi:10.1371/journal.ppat.1002106), 2011-06-23
Supplement: ppat.1002106.s013.pdf [file ppat.1002106.s013.pdf]

**Table S7:** Predicted phenotypes and V3 sequences of longitudinally isolated Env clones of subject DS8 for which coreceptor usage was determined in the Trofile assay.

| Time point<br>(mo to T0) | <i>n</i> clones | Phenotype<br>Trofile | Predicted phenotype<br>(PSSM/g2p) | V3 sequence <sup>a</sup><br>CTRPSNNTRQGIHIGPGRAFYYATTKIIGDIRQAYC |
|--------------------------|-----------------|----------------------|-----------------------------------|------------------------------------------------------------------|
| -7                       | 4               | R5                   | nsi/r5                            | -----I-.--D-----K---                                             |
|                          | 2               | R5                   | nsi/r5                            | -----                                                            |
|                          | 2               | Dual-R               | nsi/r5                            | -----                                                            |
|                          | 2               | Dual-R               | si/r5                             | -----K---                                                        |
|                          | 2               | Dual-R               | si/x4                             | -----R--Y-----K---                                               |
| -3                       | 3               | R5                   | nsi/r5                            | -----KS-----L-.--D-----K---                                      |
|                          | 1               | R5                   | nsi/r5                            | -----                                                            |
|                          | 1               | R5                   | nsi/r5                            | -----I-.--N-----K---                                             |
|                          | 1               | R5                   | nsi/r5                            | ---N---KKSVN-----I-.--D-----K---                                 |
|                          | 1               | R5                   | si/r5                             | -----K---                                                        |
|                          | 4               | Dual-R               | si/r5                             | -----K---                                                        |
|                          | 1               | Dual-X               | si/r5                             | -----V---K---                                                    |
|                          | 1               | Dual-X               | si/x4                             | -----R--V-----I-----K---                                         |
| 0                        | 1               | Dual-X               | si/x4                             | -----R-----K---                                                  |
|                          | 2               | R5                   | nsi/r5                            | -----SV-----L-.--N-----K---                                      |
|                          | 1               | R5                   | nsi/r5                            | ---N---SV-----L-.--N-----K---                                    |
|                          | 1               | R5                   | nsi/r5                            | ---N---SV-----L-.--D-----K---                                    |
|                          | 1               | R5                   | nsi/r5                            | -----I-.--N-----K---                                             |
|                          | 1               | R5                   | si/r5                             | -----K---                                                        |
|                          | 1               | R5                   | si/r5                             | -----SV-----L-T-----K---                                         |
|                          | 2               | Dual-R               | si/r5                             | -----K---                                                        |
|                          | 2               | Dual-X               | si/x4                             | -----R-----I-----K---                                            |
|                          | 1               | Dual-X               | si/x4                             | -----R--R-----I-----K---                                         |

<sup>a</sup> V3 amino acid sequences are shown relative to the major sequence in PBMCs at time point -12 months as determined by ultra-deep sequencing. A dot indicates a deletion in the V3 loop at that position.
