# Supplementary material for: Detection of Inferred CCR5- and CXCR4-Using HIV-1 Variants and Evolutionary Intermediates Using Ultra-Deep Pyrosequencing
Source: PubMed Central journal article supplement (PMC3121885; doi:10.1371/journal.ppat.1002106), 2011-06-23
Supplement: ppat.1002106.s014.pdf [file ppat.1002106.s014.pdf]

**Table S8:** Predicted phenotypes and V3 sequences of longitudinally isolated Env clones of subject DS9 for which coreceptor usage was determined in the Trofile assay.

| Time point<br>(mo to T0) | <i>n</i> clones | Phenotype<br>Trofile | Predicted phenotype<br>(PSSM/g2p) | V3 sequence <sup>a</sup><br>CVRPGNNTRKSIITIGPGKAFYT-REIIGNIRQAHC |
|--------------------------|-----------------|----------------------|-----------------------------------|------------------------------------------------------------------|
| -3                       | 8               | R5                   | nsi/x4                            | -M-----A-G---D--K---                                             |
|                          | 3               | R5                   | nsi/x4                            | -M-----R---A-G---D--K---                                         |
|                          | 1               | R5                   | nsi/x4                            | -M-----R---A-G-----                                              |
|                          | 1               | dual-R               | nsi/x4                            | -M-----A-G---D--K---                                             |
| 0                        | 1               | R5                   | nsi/r5                            | -M-----K-----A-G---D--K---                                       |
|                          | 6               | R5                   | nsi/x4                            | -M-----A-G---D--K---                                             |
|                          | 1               | R5                   | nsi/x4                            | -M-----R---A-G---D--K---                                         |
|                          | 1               | R5                   | nsi/x4                            | -M-----R-----R---A-G---D--K---                                   |
|                          | 1               | R5                   | nsi/x4                            | -M-----A---R---A-G---D--K---                                     |
|                          | 1               | dual-X               | nsi/x4                            | -M-----R---A-G---D--K---                                         |
|                          | 1               | 5                    | R5                                | nsi/x4                                                           |
| 1                        | 2               | R5                   | nsi/x4                            | -M-----R-----R---A-G---D--K---                                   |
|                          | 2               | R5                   | nsi/x4                            | -M-----R---A-G---D--K---                                         |
|                          | 1               | dual-X               | nsi/x4                            | -M-----R---A-G---D--K---                                         |
|                          | 1               | dual-X               | nsi/x4                            | -M-----A-G---D--K---                                             |
|                          | 3               | 1                    | R5                                | nsi/r5                                                           |
| 3                        | 4               | R5                   | nsi/x4                            | -M-----A-G---D--K---                                             |
|                          | 2               | R5                   | nsi/x4                            | -M-----R---A-G---D--K---                                         |
|                          | 1               | R5                   | nsi/x4                            | -M-----R-----R---A-G---D--K---                                   |
|                          | 1               | dual-X               | nsi/x4                            | -M-----R---A-G---D--K---                                         |
|                          | 1               | dual-X               | nsi/x4                            | -M-----A-G---D--K---                                             |
| 4                        | 1               | R5                   | nsi/r5                            | -----R-----R---A-G---D--K---                                     |
|                          | 5               | R5                   | nsi/x4                            | -M-----A-G---D--K---                                             |
|                          | 2               | R5                   | nsi/x4                            | -M-----R-----R---A-G---D--K---                                   |
|                          | 2               | R5                   | nsi/x4                            | -M-----R---A-G---D--K---                                         |
|                          | 5               | dual-X               | nsi/x4                            | -M-----R---A-G---D--K---                                         |

<sup>a</sup> V3 amino acid sequences are shown relative to the major sequence in PBMCs at time point -12 months as determined by ultra-deep sequencing.
