# Supplementary material for: Detection of Inferred CCR5- and CXCR4-Using HIV-1 Variants and Evolutionary Intermediates Using Ultra-Deep Pyrosequencing
Source: PubMed Central journal article supplement (PMC3121885; doi:10.1371/journal.ppat.1002106), 2011-06-23
Supplement: ppat.1002106.s015.pdf [file ppat.1002106.s015.pdf]

**Table S9:** Predicted phenotypes and V3 sequences of longitudinally isolated Env clones of subject DS10 for which coreceptor usage was determined in the Trofile assay.

| Time point<br>(mo to T0) | <i>n</i> clones | Phenotype<br>Trofile | Predicted phenotype<br>(PSSM/g2p) | V3 sequence <sup>a</sup><br>CTRPNNTKRDIIHIGPGR-AFYATE-IVGDIRQAHC |                             |
|--------------------------|-----------------|----------------------|-----------------------------------|------------------------------------------------------------------|-----------------------------|
| -3                       | 1               | R5                   | si/r5                             | -----P-----D-----                                                |                             |
|                          | 1               | R5                   | si/x4                             | -----AKG-----M---R---N---R---                                    |                             |
|                          | 7               | Dual-R               | si/x4                             | -----A-G-----M---QR-----R---                                     |                             |
|                          | 1               | Dual-R               | si/x4                             | -----AKG-----M---QR-----R---                                     |                             |
| 0                        | 4               | R5                   | nsi/r5                            | -----R-N-----M---GQ-I-N-----                                     |                             |
|                          | 1               | R5                   | nsi/r5                            | -----RK-----M---GQ-I-N-----                                      |                             |
|                          | 1               | R5                   | si/r5                             | -----RK-----D-----                                               |                             |
|                          | 3               | R5                   | si/x4                             | -----A-G-----M---QR-----R---                                     |                             |
|                          | 1               | R5                   | si/x4                             | -----AKG-----M---QR-----R---                                     |                             |
|                          | 1               | R5                   | si/x4                             | -----AKG-----M---R-----R---                                      |                             |
|                          | 1               | R5                   | si/x4                             | -----AKG--L-----M---QR-----R---                                  |                             |
|                          | 1               | Dual-R               | si/x4                             | -----A-G-----M---QR-----R---                                     |                             |
|                          | 3               | 1                    | R5                                | nsi/r5                                                           | -----RK-----M---GE-----R--- |
|                          |                 | 1                    | R5                                | si/r5                                                            | -----P-----D-----           |
| 3                        |                 | R5                   | si/x4                             | -----A-G-----M---QR-----R---                                     |                             |
| 7                        |                 | Dual-R               | si/x4                             | -----A-G-----M---QR-----R---                                     |                             |
| 1                        |                 | Dual-R               | si/r5                             | -----R-G-----AI-F---R---N-----                                   |                             |
| 6                        | 6               | R5                   | si/r5                             | -----P-----D-----                                                |                             |
|                          | 1               | R5                   | si/x4                             | -----AKG-----M---QR-----R---                                     |                             |
|                          | 1               | Dual-R               | si/x4                             | -----AKG-----M---QR-----R---                                     |                             |
|                          | 5               | Dual-X               | si/x4                             | -----A-G-R-----VI--AKR-----R---                                  |                             |

<sup>a</sup> V3 amino acid sequences are shown relative to the major sequence in PBMCs at time point -12 months as determined by ultra-deep sequencing.
